# Supplementary material for: Raludotatug Deruxtecan, a CDH6-Targeting Antibody–Drug Conjugate with a DNA Topoisomerase I Inhibitor DXd, Is Efficacious in Human Ovarian and Kidney Cancer Models
Source: Oxford University Press journal article supplement (doi:10.1158/1535-7163.mct-23-0287), 2024-01-10
Supplement: mct-23-0287_table_s2_suppst2.pdf [file mct-23-0287_table_s2_suppst2.pdf]

**A**

PK parameters in mice after the intravenous administration of R-DXd.

| Analyte | Dose<br>(mg/kg) | AUC <sub>0-21d</sub><br>(day·µg/mL) | T <sub>1/2</sub><br>(h) | CL<br>(mL/day/kg) | V <sub>ss</sub><br>(mL/kg) |
|---------|-----------------|-------------------------------------|-------------------------|-------------------|----------------------------|
| R-DXd   | 0.25            | 5.76 ± 0.38                         | 1.26 ± 0.20             | 44.1 ± 2.7        | 55.6 ± 6.4                 |
|         | 0.5             | 10.3 ± 2.0                          | 1.21 ± 0.19             | 50.7 ± 11.1       | 56.7 ± 7.8                 |
|         | 1               | 30.9 ± 16.0                         | 1.33 ± 0.67             | 43.1 ± 30.6       | 60.6 ± 3.2                 |
|         | 2               | 73.4 ± 36.4                         | 1.30 ± 0.45             | 33.2 ± 18.4       | 59.3 ± 1.4                 |
|         | 4               | 173 ± 64                            | 1.85 ± 0.40             | 25.0 ± 8.0        | 68.8 ± 7.3                 |
|         | 8               | 249 ± 29                            | 2.55 ± 1.00             | 32.3 ± 3.8        | 84.6 ± 12.1                |

PK parameters were calculated based on the concentrations determined in plasma, which were collected 1, 6, 24, 72, 168, 336, and 504 h after the intravenous administration of R-DXd (0.25, 0.5, 1, 2, 4, and 8 mg/kg) using non-compartmental analysis. Each value represents the mean and SD (*N*=3).

AUC<sub>0-21d</sub>: area under the plasma concentration-time curve up to 21 days, T<sub>1/2</sub>: terminal elimination half-life, CL: total body clearance, V<sub>ss</sub>: volume of distribution in a steady state.

**B**

PK parameters in monkeys after the intravenous administration of R-DXd.

| Analytes | Dose<br>(mg/kg) | AUC <sub>0-28d</sub><br>(day·µg/mL) | T <sub>1/2</sub><br>(h) | CL<br>(mL/day/kg) | V <sub>ss</sub><br>(mL/kg) |
|----------|-----------------|-------------------------------------|-------------------------|-------------------|----------------------------|
| R-DXd    | 0.3             | 19.5 ± 3.7                          | 2.61 ± 0.66             | 15.8 ± 3.5        | 47.7 ± 4.8                 |
|          | 1               | 110 ± 34                            | 4.19 ± 1.26             | 9.71 ± 3.74       | 50.3 ± 4.2                 |
|          | 3               | 334 ± 28                            | 6.32 ± 1.25             | 8.62 ± 0.88       | 69.1 ± 13.3                |
|          | 10              | 874 ± 188                           | 7.56 ± 0.78             | 11.2 ± 2.3        | 84.9 ± 8.4                 |
| Total Ab | 0.3             | 17.5 ± 2.6                          | 2.19 ± 0.37             | NA                | NA                         |
|          | 1               | 98.3 ± 30.1                         | 4.05 ± 1.16             | NA                | NA                         |
|          | 3               | 309 ± 30                            | 6.10 ± 1.12             | NA                | NA                         |
|          | 10              | 841 ± 199                           | 7.93 ± 0.98             | NA                | NA                         |

PK parameters were calculated based on the concentrations determined in plasma, which were collected 0.083, 1, 7, 24, 72, 168, 336, 504, and 672 h after the intravenous administration of R-DXd (0.3, 1, 3, and 10 mg/kg) using non-compartmental analysis. Each value represents the mean and SD (*N*=3).

AUC<sub>0-28d</sub>: area under the plasma concentration-time curve up to 28 days, T<sub>1/2</sub>: terminal elimination half-life, CL: total body clearance, V<sub>ss</sub>: volume of distribution in a steady state, NA: not applicable.
